# Supplementary material
Source: publisher figshare collection journal article supplement (https://acs.figshare.com/ndownloader/files/15077537)
Supplement: Supplementary file 1 [file 15077537]

## Supporting Information

### Observing the Kinetic Pathway of Nanotube Formation from Bolaamphiphiles by Time-Resolved Small-Angle X-ray Scattering

Rintaro Takahashi,<sup>†‡</sup> Hiroki Kawauchi,<sup>†‡</sup> Naohiro Kameta,<sup>‡</sup> Ji Ha Lee,<sup>†</sup>  
Shota Fujii,<sup>†</sup> Toshimi Shimizu,<sup>§</sup> Kazuo Sakurai<sup>\*†</sup>

<sup>†</sup>*Department of Chemistry and Biochemistry, University of Kitakyushu, 1-1 Hibikino,  
Wakamatsu-ku, Kitakyushu, Fukuoka 808-0135, Japan*

<sup>‡</sup>*Nanomaterials Research Institute, Department of Materials and Chemistry, and*

<sup>§</sup>*Emeritus Researcher, National Institute of Advanced Industrial Science and  
Technology (AIST), Tsukuba Central 5, 1-1-1 Higashi, Tsukuba, Ibaraki 305-8565,  
Japan*

<sup>\*</sup>*(K.S.) E-mail: sakurai@kitakyu-u.ac.jp.*

<sup>†</sup>*These authors contributed equally to this work.*

**Comparison of the experimentally-obtained data with the model of a short tubular structure.** The scattering intensity of a tube (uniform inner density; applicable to a short tube) with the length ( $L$ ) and the cross-sectional radius of exterior ( $R_E$ ) and interior ( $R_I$ ) are expressed as follows:

$$I_{\text{tube}}(q) \propto \int_0^{\pi/2} \left\{ \left[ \frac{R_E^2 J_1(q R_E \sin \alpha)}{q R_E \sin \alpha} - \frac{R_I^2 J_1(q R_I \sin \alpha)}{q R_I \sin \alpha} \right] \frac{\sin[q(L/2) \cos \alpha]}{q(L/2) \cos \alpha} \right\}^2 \sin \alpha d\alpha \quad (\text{S1})$$

We note that eq 3 in the main text is applicable only in a case that  $L$  is long enough, but eq S1 is applicable regardless of the  $L$  value. Although eq S1 neglects the structure within the layer as shown in Figure 3b, such a local structure influences higher  $q$  region ( $q > 0.5 \text{ nm}^{-1}$ ). Figure S1 shows the SAXS profile at  $t = 0.027 \text{ s}$  and the fitted curves by the tube model (eq S1) with the various  $L$  values under  $R_E = 9.39 \text{ nm}$  and  $R_I = 5.6 \text{ nm}$ . The short tube model could not reproduce the experimentally obtained data particularly in the sharp oscillation at  $q \sim 0.3 \text{ nm}^{-1}$ .

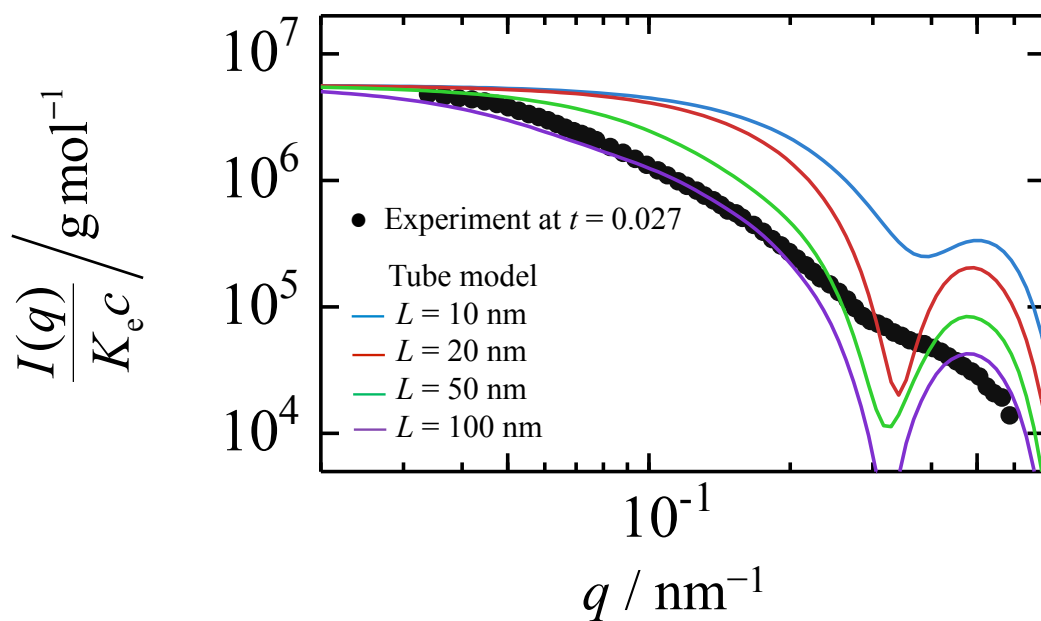

**Figure S1.** SAXS profile at  $t = 0.027$  (black circles). The black solid curves represent the fitted curves by a short tubular model (eq S1) with the  $L$  value of 10 nm (blue curve), 20 nm (red curve), 50 nm (green curve), and 100 nm (purple curve), where the  $R_E$  and  $R_I$  values are fixed to 9.39 nm and 5.6 nm, respectively.
